# Supplementary material for: Rice Big Grain 1 promotes cell division to enhance organ development, stress tolerance and grain yield
Source: PubMed Central journal article supplement — Plant Biotechnol J. 2020 Feb 19;18(9):1969–83. doi: 10.1111/pbi.13357 (PMC7415788; doi:10.1111/pbi.13357), 2020-02-19
Supplement: PBI-18-1969-s001.pdf [file PBI-18-1969-s001.pdf]

## Supporting Information for

### ***Rice Big Grain 1* promotes cell division to enhance organ development, stress tolerance and grain yield**

Shuen-Fang Lo<sup>1,2</sup>, Ming-Lung Cheng<sup>1,3</sup>, Yue-Ie Hsing<sup>4</sup>, Yi-Shih Chen<sup>1</sup>, Kuo-Wei Lee<sup>1</sup>, Ya-Fang Hong<sup>4</sup>, Yu Hsiao<sup>1</sup>, An-Shan Hsiao<sup>4</sup>, Pei-Jing Chen<sup>1,2</sup>, Lai-In Wong<sup>1,2</sup>, Nan-Chen Chen<sup>1,4</sup>, Christophe Reuzeau<sup>5\*</sup>, Tuan-Hua David Ho<sup>2,3,4,6\*</sup>, Su-May Yu<sup>1,2,3,6\*</sup>

<sup>1</sup> Institute of Molecular Biology, Academia Sinica, Nankang, Taipei 115, Taiwan, ROC

<sup>2</sup> Agricultural Biotechnology Center, National Chung Hsing University, Taichung 402, Taiwan, ROC

<sup>3</sup> Department of Life Sciences, National Cheng Kung University, Tainan 701, Taiwan, ROC

<sup>4</sup> Institute of Plant and Microbial Biology, Academia Sinica, Nankang, Taipei 115, Taiwan, ROC

<sup>5</sup> CropDesign N.V., BASF Plant Science, Kerrebroek 66b, B-9850 Nevele, Belgium

<sup>6</sup> Department of Life Sciences, National Chung Hsing University, Taichung 402, Taiwan, ROC

Running title: RBG1 enhances organ size and stress recovery

Key words: rice, grain size, cell division, auxin, microtubule, root, abiotic stress

\* Co-corresponding authors:

Su-May Yu

Phone: 886-2-2788-2695

FAX: 886-2-2782-6085

e-mail : [sumay@imb.sinica.edu.tw](mailto:sumay@imb.sinica.edu.tw)

Christophe Reuzeau

Phone : +32-92423-463

FAX :+ 32-9-388 9600

e-mail : [christophe.reuzeau@cropdesign.com](mailto:christophe.reuzeau@cropdesign.com)

Tuan-Hua David Ho

Phone: 886-2-2787-1188

FAX: 886-2-2782-1605

E-mail: [tho@gate.sinica.edu.tw](mailto:tho@gate.sinica.edu.tw); [ho@biology2.wustl.edu](mailto:ho@biology2.wustl.edu)

## Supporting Text

### ***RBG1* encodes a novel protein with six conserved motifs**

Amino acid alignment revealed that six highly-conserved motifs are shared among most members of the RBG1 and RBG1-L clusters (Figure S7). RBG1-L contains five conserved motifs (motifs 1 to 5) that are similar to those in RBG1 even though the overall sequence similarity to RBG1 is only 30%, mostly due to the aforementioned divergence in inter-motif sequences (Figure S7).

To understand the function of the six conserved motifs in regulating grain size, we individually deleted each of the six motifs from RBG1 and the mutants were overexpressed in transgenic rice. We compared RBG1 variant mRNA levels and seed lengths (Figure S8b) and found that the motif 3-deleted RBG1-overexpressing line (referred to as RBG1- $\Delta$ D3) exhibited a similar seed length to the full-length WT RBG1-overexpressing line (RBG1-Ox-5). The seed lengths of the remaining truncated RBG1-overexpressing lines, i.e., RBG1- $\Delta$ D1, RBG1- $\Delta$ D2, RBG1- $\Delta$ D4, RBG1- $\Delta$ D5, and RBG1- $\Delta$ D6, were all shorter than those of full-length RBG1-Ox-5. These results indicate that all of these domains (i.e., with the exception of domain 3) are crucial for RBG1 regulation of seed size. Notably, RBG1 transcript levels appeared to be lower than that of WT in the RBG1- $\Delta$ D4 and RBG1- $\Delta$ D5 overexpressing lines, suggesting that motifs 4 and 5 could be essential for the stability of RBG1 transcripts.

### **RBG1 is a unique protein with six conserved motifs separated by stretches of amino acid homopolymers**

RBG1 homologs have been found in both monocots and dicots, but not in other plant groups, indicating that these genes are specific to angiosperms and that they probably arose in a recent evolutionary event. The protein structure of RBG1 is unusual. It has six conserved domains that are shared among its homologs (Figure S7), but these motifs reveal no significant similarity with sequences of known functions. Apart from motif 3, all these motifs appear to be essential for the function of RBG1, as deletions of any of them failed to generate the big grain phenotype (Figure S8b). The six conserved domains are also present in dicot RBG1 homologs, but overexpression of *RBG1* in *Arabidopsis* did not lead to the big grain phenotype (Figure S9d-f). Although we have revealed substantial information about the role of *RBG1* in rice, the function of *RBG1* homologs in dicots is virtually unknown. More work in dicots or other species would be needed to support the results obtained in rice.

### **QTL associates with RBG1**

We examined the QTL Annotation Rice Online (Q-TARO) database (<http://qtaro.abr.affrc.go.jp/>) to assess the QTL information associated with the chromosome region where *RBG1* is mapped to (Yonemaru et al., 2010). Intriguingly, *RBG1* is located within QTLs for regulating seed length, soil stress tolerance, and drought stress tolerance (Figure S12 and Table S5) (Moncada et al., 2001; Qi et al., 2008; Yoshida et al., 2002). The well-known QTLs related to grain shape are *GW2*, *GS5* and *GW5/qSW5* located on chromosomes 2, 3, and 5, respectively (Lu et al., 2013). A QTL on chromosome 11 has been suggested to have the largest impact on grain length (Yoshida et al., 2002), but the identity of the target gene is unknown. We suggest that *RBG1* is likely the candidate gene in this QTL on chromosome 11. Moreover, co-localization with stress QTLs revealed that *RBG1* may regulate not only grain length but also abiotic stress tolerance (Table S5).

## Supporting methods

### Construction of *RBG1*-truncated mutants

To generate *RBG1*-truncated mutants, each comprising a deletion of one of the six conserved motifs, full-length *RBG1* cDNA in the pENTR/MCS vector was employed as template for inverse PCR, using primers flanking conserved regions. KOD DNA polymerase (TOYOBO) was used to generate *RBG1* mutants lacking either motif 1, 2, 3, 4 or 5, whereas VioTaq DNA polymerase was employed to generate the motif 6-lacking *RBG1* mutant. PCR products were heated at 70 °C for 5 minutes, 5'-end-phosphorylated by T4 polynucleotide kinase, and then self-ligated. Resulting plasmids were transferred to XL1-blue *E. coli* competent cells. Correct DNA sequences of *RBG1*-truncated mutants were confirmed by nucleotide sequencing of genomic DNA isolated from *E. coli* and transgenic rice.

### RT-PCR and qRT-PCR analysis

Total RNA was extracted from rice tissues, and RT-PCR and qRT-PCR analyses were conducted as described (Lo et al., 2008). For the RT-PCR analysis of *RBG1*, 5% DMSO was included in the RT-PCR reaction solution.

### Plasmid constructions

We generated the various plasmids for gene overexpression by constructing a Gateway (Invitrogen)-based destination vector, including *Ubi:attR1-Cm-ccdB-attR2-Nos*, in pZP200 vector containing the chloramphenicol (Cm)-resistance gene (bacteria selection marker), a recombination selection marker (*ccdB*) and an LR Clonase recombination site (*attR1* and *attR2*) between the *Ubi* promoter and the transcription terminator (*Nos*). *RBG1* cDNA was amplified from mRNA isolated from developing rice panicles and cloned to the Gateway entry vector pENTR/MCS. After sequence confirmation, *RBG1* cDNA was subcloned into the destination binary vector by LR Clonase to obtain pZP200 (*Ubi:RBG1-Nos*). For RNAi constructs, a destination vector pZP200 (*Ubi:attR12-RNAi-Nos*), which has a partial *GUS* cDNA flanked by *attR* in both the sense and antisense orientations, was constructed. The pZP200 (*Ubi:RBG1-RNAi-Nos*) plasmid was obtained by recombination with pENTR (*RBG1*) using LR Clonase (Invitrogen).

For studying temporal and spatial activity of the *RBG1* promoter, a 1.6 kb DNA fragment containing sequences upstream of the translation initiation codon ATG and the promoter region of *RBG1* was inserted into the pENTR/MCS vector to generate pENTR(Pro*RBG1*). LR Clonase was used to transfer the *RBG1* promoter into the pHGWFS7.0 binary vector that contains the coding

region of *GUS* protein (Karimi et al., 2005), generating the construct *RBG1:GUS*.

For subcellular localization studies, *RBG1* cDNA was first inserted into the pENTR (*mOrange2*-gene) or pENTR (*eGFP*-gene) vector, generating the pENTR (*mOrange2-RBG1*) or pENTR(*eGFP-RBG1*) plasmids. *mOrange2-RBG1* or *eGFP-RBG1* was subcloned into pBS (*CaMV35S:attR12-Nos*) to generate the pBS (*CaMV35S:mOrange2-RBG1-Nos*) or pBS (*CaMV35S:eGFP-RBG1-Nos*) plasmids using LR Clonase.

### **Rice transformation**

All rice cultivars were transformed using the *Agrobacterium* method as described (Hiei et al., 1994).

### **GUS activity staining**

GUS activity staining was conducted as described (Chen et al., 2015).

### **Scanning electron microscopy**

The abaxial epidermis cells of hull lemmae were captured by scanning electron microscopy. The numbers of protuberances in the longitudinal direction were counted in 700  $\mu\text{m}$  length intervals, which were then used to calculate the deduced cell number per seed length. The means  $\pm$  SD represent an average deduced cell number per mm or per seed length.

### **Immunofluorescence staining of microtubules**

Four-day-old seedlings were used for microtubule assays following the method described by Deng et al. (2015) (Deng et al., 2015). Approximately 1-cm segments of root tips were cut and fixed in 4% paraformaldehyde in PME buffer 1 (50 mM PIPES, 2 mM  $\text{MgSO}_4$ , 2 mM EGTA, pH 6.9) containing 0.05% Triton X-100 for 30 min. After washing thoroughly with PME buffer 1, samples were digested with 2% cellulase R-10 (Yakult Pharmaceutical Industry) and 1% pectolyase Y-23 (Yakult Pharmaceutical Industry) in PME buffer 1 at 37 °C for 30 min. The softened root tips were washed gently with PME buffer 1 and frozen and thawed twice. Samples were blocked with blocking buffer [3% BSA in PBST (137 mM NaCl, 2.7 mM KCl, 10 mM  $\text{Na}_2\text{HPO}_4$ , 1.76 mM  $\text{KH}_2\text{PO}_4$ , 0.05% Triton X-100)] for 1 h at room temperature. Samples were incubated with 1/50 diluted primary antibody anti- $\alpha$ -tubulin (T9026, Sigma) in blocking buffer at 4 °C overnight. After washing with PBST five times, samples were incubated with 1/800 diluted secondary antibody AlexaFluor488 goat anti-mouse IgG (A-11001, Invitrogen) in PBST at 37 °C for 3 h. After washing four times with PBST and once with PBS, samples were mounted with PBS containing 50% glycerol and 0.1% *o*-phenylenediamine.

Images were obtained with a 63 X water objective using a Zeiss LSM 880 equipped with argon and HeNe lasers as excitation sources. Fluorescence was excited at 488 nm and collected with a 492-560 nm filter. Z-series sections were obtained at 0.45- $\mu$ m intervals and the images of maximum intensity projection were from 10 optical slices.

### **Rice cell culture**

De-hulled rice seeds were surface sterilized and placed on an MS medium plate containing 2 mg/liter of 2,4-D for callus induction. Calli were subcultured in 50 ml of MS medium containing 3% sucrose and 2 mg/liter of 2,4-D with shaking at 90 rpm, and subcultured weekly.

### **Microarray analysis**

Total RNA was purified from coleoptiles and embryos of seedlings at 2 DAI, using Trizol® reagent (Invitrogen), and further purified with an RNeasy Mini Kit (QIAGEN). RNA quality assessment and array experiments were conducted in the Affymetrix Gene Expression Service Lab of Academia Sinica, using the GeneChip® Rice Genome Array (Affymetrix). The Affymetrix CEL files were imported into GeneSpring 12.6 software (Agilent Technologies) for data normalization, and genes with a signal ratio greater than a 3-fold change were used for function classification as described (Lo et al., 2017).

### **Abiotic stress treatment**

Seeds were germinated and seedlings were cultivated in 0.5 X Kimura solution for 21 days. Seedlings were incubated in a 42 °C incubator for 4 days, in 250 mM NaCl solution for 4 days, or in 30% PEG 6000 at 28 °C for 18 h. Salt- and PEG-treated plants were washed thoroughly with water, and all stressed plants were recovered in water for 7 days in a 28 °C incubator, and survival rates were determined.

**Table S1.** List of RBG1 and RBG1-L homologous proteins.

| Plants                             | Accession number |
|------------------------------------|------------------|
| <i>RBG1</i> homologous proteins    |                  |
| <i>Arabidopsis lyrata</i>          | XP_002867785     |
| <i>Arabidopsis thaliana</i>        | NP_567650.2      |
| <i>Brachypodium distachyon</i>     | XP_003576041     |
| <i>Cicer arietinum</i>             | XP_004486194     |
| <i>Capsella rubella</i>            | EOA16953         |
| <i>Cucumis sativus</i>             | XP_004134782     |
| <i>Fragaria vesca</i>              | XP_004295297     |
| <i>Glycine max</i> (1)             | XP_006584450     |
| <i>Glycine max</i> (2)             | KRH11496         |
| <i>Medicago truncatula</i>         | XP_003594150     |
| <i>Ricinus communis</i>            | XP_002518417     |
| <i>Solanum lycopersicum</i>        | XP_004232680     |
| <i>Sorghum bicolor</i>             | XP_002449526     |
| <i>Setaria italica</i>             | XP_004979307     |
| <i>Theobroma cacao</i>             | EOY28817         |
| <i>Vitis vinifera</i>              | XP_002270044     |
| <i>Zea mays</i> (1)                | XP_008678123.1   |
| <i>Zea mays</i> (2)                | XP_008670732.1   |
| <i>RBG1-L</i> homologous proteins  |                  |
| <i>Brachypodium distachyon_L</i>   | XP_014754150.1   |
| <i>Nicotiana tomentosiformis_L</i> | XP_009628473.1   |
| <i>Phaseolus vulgaris_L</i>        | XP_007153991.1   |
| <i>Setaria italica_L</i>           | XP_004971090.1   |
| <i>Solanum tuberosum_L</i>         | XP_006348166.1   |
| <i>Sorghum bicolor_L</i>           | EES04120.1       |
| <i>Triticum aestivum_L</i>         | CDM85783.1       |
| <i>Vigna angularis_L</i>           | BAT77345.1       |
| <i>Zea mays_L</i>                  | NP_001145328.1   |

**Table S2.** Overexpression of *RBG1* elevates the expression of stress tolerance-related genes.

|                          |                | log <sub>2</sub> FC                              |                                                                         |
|--------------------------|----------------|--------------------------------------------------|-------------------------------------------------------------------------|
| Classification           | MSU locus      | RBG1ox / WT                                      | Description                                                             |
| <b>Abiotic stress</b>    |                |                                                  |                                                                         |
| Response to heat         | LOC_Os03g53340 | 5.836                                            | heat shock factor protein HSF8, putative, expressed                     |
|                          | LOC_Os11g13980 | 5.695                                            | 22.0 kDa class IV heat shock protein precursor, putative, expressed     |
|                          | LOC_Os06g09560 | 4.004                                            | dnaJ protein, putative, expressed                                       |
|                          | LOC_Os02g54140 | 3.698                                            | 17.5 kDa class II heat shock protein, putative, expressed               |
|                          | LOC_Os05g44340 | 3.693                                            | heat shock protein 101, putative, expressed                             |
|                          | LOC_Os04g36750 | 3.670                                            | 22.0 kDa class IV heat shock protein precursor, putative, expressed     |
|                          | LOC_Os02g52150 | 3.569                                            | heat shock 22 kDa protein, mitochondrial precursor, putative, expressed |
|                          | LOC_Os12g38180 | 3.526                                            | heat shock cognate 70 kDa protein 2, putative, expressed                |
|                          | LOC_Os03g53340 | 3.485                                            | heat shock factor protein HSF8, putative, expressed                     |
|                          | LOC_Os03g53340 | 3.480                                            | heat shock factor protein HSF8, putative, expressed                     |
|                          | LOC_Os03g16030 | 3.274                                            | 17.4 kDa class I heat shock protein 3, putative, expressed              |
|                          | LOC_Os03g16020 | 3.117                                            | 17.4 kDa class I heat shock protein 2, putative, expressed              |
|                          | LOC_Os04g01740 | 3.083                                            | heat shock protein 82, putative, expressed                              |
|                          | LOC_Os04g01740 | 2.958                                            | heat shock protein 82, putative, expressed                              |
|                          | LOC_Os04g45480 | 2.871                                            | heat shock protein STI, putative, expressed                             |
|                          | LOC_Os03g16030 | 2.840                                            | 17.4 kDa class I heat shock protein 3, putative, expressed              |
|                          | LOC_Os04g01740 | 2.823                                            | heat shock protein 82, putative, expressed                              |
|                          | LOC_Os09g35790 | 2.733                                            | heat shock factor protein 7, putative, expressed                        |
|                          | LOC_Os01g04360 | 2.597                                            | 16.9 kDa class I heat shock protein 3, putative, expressed              |
|                          | LOC_Os02g54140 | 2.560                                            | 17.5 kDa class II heat shock protein, putative, expressed               |
|                          | LOC_Os10g28340 | 2.518                                            | heat shock factor protein HSF30, putative, expressed                    |
|                          | LOC_Os04g01740 | 2.466                                            | heat shock protein 82, putative, expressed                              |
|                          | LOC_Os04g01740 | 2.464                                            | heat shock protein 82, putative, expressed                              |
|                          | LOC_Os04g01740 | 2.429                                            | heat shock protein 82, putative, expressed                              |
|                          | LOC_Os06g08154 | 2.342                                            | receptor-like protein kinase 5 precursor, putative, expressed           |
|                          | LOC_Os06g14240 | 2.224                                            | 17.4 kDa class I heat shock protein 3, putative, expressed              |
|                          | LOC_Os02g54140 | 2.215                                            | 17.5 kDa class II heat shock protein, putative, expressed               |
|                          | LOC_Os01g42190 | 2.149                                            | dnaJ-like protein, putative, expressed                                  |
|                          | LOC_Os01g04380 | 2.113                                            | 16.9 kDa class I heat shock protein 2, putative, expressed              |
|                          | LOC_Os05g35400 | 2.083                                            | luminal-binding protein 5 precursor, putative, expressed                |
|                          | LOC_Os03g16920 | 2.025                                            | heat shock cognate 70 kDa protein, putative, expressed                  |
|                          | LOC_Os03g15960 | 1.993                                            | 17.4 kDa class I heat shock protein 3, putative, expressed              |
|                          | LOC_Os05g38530 | 1.804                                            | heat shock cognate 70 kDa protein, putative, expressed                  |
|                          | LOC_Os06g46900 | 1.727                                            | phosphosulfolactate synthase-related protein, putative, expressed       |
|                          | LOC_Os02g08490 | 1.717                                            | chaperone clpB 1, putative, expressed                                   |
| LOC_Os06g35960           | -1.716         | heat shock factor protein 3, putative, expressed |                                                                         |
| Receptor protein kinases | LOC_Os05g06240 | 2.351                                            | receptor protein kinase TMK1 precursor, putative                        |
|                          | LOC_Os02g34490 | 1.832                                            | Leucine Rich Repeat family protein, expressed                           |
| Others                   | LOC_Os05g28740 | 3.834                                            | universal stress protein, putative, expressed                           |
|                          | LOC_Os05g03130 | 1.757                                            | expressed protein                                                       |
|                          | LOC_Os10g30150 | 1.734                                            | ethylene-responsive protein, putative, expressed                        |



**Table S3.** Effect of *RBG1* overexpression driven by the *GOS2* promoter on agronomic traits in *japonica* rice (J) and in *indica* rice (I). TraitMill greenhouse experiments were performed in 2012 (I) and in 2014 (J). Percentage change over WT is shown for each trait together with p-values from statistical analysis.

| Constructs                   | Biomass | Height | Thousand Kernel Weight | Fill rate | Seed yield per plant | Harvest Index |
|------------------------------|---------|--------|------------------------|-----------|----------------------|---------------|
| <i>pGOS2 ::RBG1-016A</i> (J) | 28.1    | 16.1   | 13.8                   | 20.6      | 76.4                 | 40.7          |
| p-value                      | 0.0158  | 0.0002 | 0                      | 0.0003    | 0.0001               | 0             |
| <i>pGOS2 ::RBG1-041A</i> (J) | 3.2     | 7      | 6.6                    | 14.2      | 29.6                 | 25.1          |
| p-value                      | 0.6301  | 0.0207 | 0.0012                 | 0.0018    | 0.0815               | 0.0218        |
| <i>pGOS2 ::RBG1-049A</i> (J) | 7.7     | 3.3    | 10                     | 14.3      | 45.3                 | 39.2          |
| p-value                      | 0.3831  | 0.2323 | 0                      | 0.0004    | 0.0333               | 0.0169        |
| <i>pGOS2 ::RBG1-51A</i> (J)  | 14.2    | 9.8    | 8.3                    | 21        | 50.2                 | 25.4          |
| p-value                      | 0.2671  | 0.0189 | 0.0017                 | 0.0006    | 0.0294               | 0.0243        |
| <i>pGOS2 ::RBG1-205A</i> (I) | 16.8    | 8.1    | 11.2                   | 26.1      | 74.8                 | 36            |
| p-value                      | 0.072   | 0.2643 | 0.0888                 | 0.3654    | 0.2536               | 0.4663        |
| <i>pGOS2 ::RBG1-002A</i> (I) | 8.8     | 8.1    | 0.7                    | 65.6      | 193.6                | 161.2         |
| p-value                      | 0.5328  | 0.3584 | 0.829                  | 0.2439    | 0.1101               | 0.128         |
| <i>pGOS2 ::RBG1-123A</i> (I) | 12.6    | 5.9    | 25.4                   | 8.9       | 177.7                | 160.8         |
| p-value                      | 0.0836  | 0.3498 | 0.0001                 | 0.8494    | 0.2195               | 0.114         |

**Table S4.** List of primers.

| Primer                                        | Sequence                  | Gene and purpose                              | Reference |
|-----------------------------------------------|---------------------------|-----------------------------------------------|-----------|
| <b>Genotyping of T-DNA insertion mutants</b>  |                           |                                               |           |
| M35973-GT-F1                                  | TGGGCATAGACCCAGAGTAACACA  | <i>RBG1<sub>Act</sub></i> genotyping (830 bp) |           |
| M35973-GT-R1                                  | CAGCCCGCGTTGTTTTTC        |                                               |           |
| RB                                            | AACTCATGGCGATCTCTTACC     | TRIM mutant genotyping                        |           |
| <b><i>RBG1</i> RT-PCR and qRT-PCR</b>         |                           |                                               |           |
| RBG1-RT -Ac-F1                                | CCGTCGCGGATGATGATGAT      | <i>RBG1</i> (555 bp)                          |           |
| RBG1-RT -Ac-R1                                | TTGGCTTGTCCCTTGTGGTGC     |                                               |           |
| RBG1-q-PCR-F2                                 | AACCGGCGGCGCCAAGAA        | <i>RBG1</i> qRT-PCR (96 bp)                   |           |
| RBG1-q-PCR-R2                                 | CGGTACCCGATGCAGGAGTTGAT   |                                               |           |
| 30430-RT -Ac-F                                | GAAGCAGTCTCCACGCCGA       | <i>RBG1</i> cDNA (139 bp)                     |           |
| 30430-RT -Ac-R                                | CAGCCATCATCATCATCA        |                                               |           |
| Actin 1-5'                                    | CTGATGGACAGGTTATCACC      | <i>Actin 1</i> (567 bp)                       |           |
| Actin 1-3'                                    | CAGGTAGCAATAGGTATTACAG    |                                               |           |
| 18S rRNA-5'                                   | CAACTTTCGATGGTAGGATAGGG   | <i>18s rRNA</i> (197 bp)                      |           |
| 18S rRNA-3'                                   | CCAATTACCAGACACTAAAGCGC   |                                               |           |
| Ubi-5'                                        | CAATGGAGCTATGGTTGTCTGGT   | Rice <i>Ubiquitin</i> (204 bp)                |           |
| Ubi-3'                                        | CAGCACAAAAGGGTATAGCAGAA   |                                               |           |
| <b><i>RBG1</i> domain truncation</b>          |                           |                                               |           |
| RBG1-dom1F                                    | CTCGACGCCGACCCCGCC        | RBG1 dom1 truncated                           |           |
| RBG1-dom1R                                    | GGCGCTGCTGCTCCGCCG        |                                               |           |
| RBG1-dom2F                                    | CTCCAACCCCTCCCCTACC       | RBG1 dom2 truncated                           |           |
| RBG1-dom2R                                    | GGAGGGGGATGCGGCGGG        |                                               |           |
| RBG1-dom3F                                    | TCCCGGAGCCGCTCCGCC        | RBG1 dom3 truncated                           |           |
| RBG1-dom3R                                    | CGATCCGCCTCCGCCTCC        |                                               |           |
| RBG1-dom4F5                                   | CCGGGCGAGGCGGCGGCGGTGGCGT | RBG1 dom4 truncated                           |           |
| RBG1-dom4R5                                   | TCGCCCCGGCGGCGGGCGGGGCTTC |                                               |           |
| RBG1-dom5F                                    | CCGCCATCGCCGGCGGCG        | RBG1 dom5 truncated                           |           |
| RBG1-dom5R                                    | CGGCACGCCGCCGCCTGC        |                                               |           |
| RBG1-dom6F2                                   | GGGTACCGCCACCAGGTGA       | RBG1 dom6 truncated                           |           |
| RBG1-dom6R2                                   | CAGGTTGATGCCGCGTATCC      |                                               |           |
| <b>Cloning of native <i>RBG1</i> promoter</b> |                           |                                               |           |
| 30430-PG-F3                                   | GCACGGCTCGGCAGTTTATT      | <i>RBG1</i> promoter (1623 bp)                |           |
| 30430-PG-R                                    | CGGATCGGCGTGGAGACT        |                                               |           |

**RT-PCR of grain size-related genes**

---

|          |                        |                             |                                        |
|----------|------------------------|-----------------------------|----------------------------------------|
| BG1-RT-F | CATCCACGCTGCTCGACGC    | <i>BG1</i> RT-PCR (576 bp)  | (Liu et al., 2015)                     |
| BG1-RT-R | CGCTGTCCAAGAACCGCACG   |                             |                                        |
| DEP2-F   | TGCGTGATAGCCTAGAACGAAG | <i>DEP2</i> RT-PCR (23 bp)  | (Abe et al., 2010;<br>Li et al., 2010) |
| DEP2-R   | CTGGAATCAGCACTCCTGGATG |                             |                                        |
| GIF1-F   | CATCGCGCAACCCGAACATG   | <i>GIF1</i> RT-PCR (143 bp) | (Wang et al.,<br>2008)                 |
| GIF1-R   | CAGGATGCACGCCTTTCCTC   |                             |                                        |
| GL3-F    | TCACAACTCCCAGGATAGG    | <i>GL3</i> RT-PCR (126 bp)  | (Qi et al., 2012)                      |
| GL3-R    | TTTGTCTCGCTCGCTCAT     |                             |                                        |
| GS3-F    | CATCGGAGAAGCGAAGTCA    | <i>GS3</i> RT-PCR (109 bp)  | (Fan et al., 2006)                     |
| GS3-R    | CAGCAGCAGATCCAGGAGA    |                             |                                        |
| GS5-F    | AGTGGACTGCTTCCAGGGAAG  | <i>GS5</i> RT-PCR (180 bp)  | (Li et al., 2011)                      |
| GS5-R    | CACGCAGTACCGAGAACTGA   |                             |                                        |
| GW2-F    | CTGCAGCAGGGAAGTGGTAA   | <i>GW2</i> RT-PCR (142 bp)  | (Song et al.,<br>2007)                 |
| GS2-R    | GTTCTCGGCGAAAGGCAGC    |                             |                                        |
| GW8-F    | AGGAGTTTGATGAGGCCAAG   | <i>GW8</i> -RT-PCR (204 bp) | (Wang et al.,<br>2012)                 |
| GW8-R    | GCGTGTAGTATGGGCTCTC    |                             |                                        |
| RGA1-F   | GCAGCAAGCCTGACCGTGTG   | <i>RGA1</i> RT-PCR (120 bp) | (Seo et al., 1995)                     |
| RGA1-R   | CTTCCCTGGAGCGTCTCATGC  |                             |                                        |

---

**Table S5.** Detailed information on the QTLs on chromosome 11 that regulate seed length and abiotic stresses in rice.

| <b>QTL entry</b>             |                                             |                                    |                                             |                                             |
|------------------------------|---------------------------------------------|------------------------------------|---------------------------------------------|---------------------------------------------|
| Q-TARO ID.                   | 154                                         | 940                                | 904                                         | 905                                         |
| QTL                          |                                             | qDLR11                             | gpl11.1                                     | gw11.1                                      |
| Major category               | Morphological trait                         | Resistance or Tolerance            | Resistance or Tolerance                     | Resistance or Tolerance                     |
| Category of object character | <b>Seed</b>                                 | <b>Other soil stress tolerance</b> | <b>Drought tolerance</b>                    | <b>Drought tolerance</b>                    |
| Character                    | <b>grain length</b>                         | <b>Dead leaf rate at 20 days</b>   | <b>Grains per plant</b>                     | <b>1000-grain weight</b>                    |
| Marker                       | SSR                                         | SSR                                | RFLP                                        | RFLP                                        |
| Genome Start (bp)            | 2827521                                     | 383711                             | 17246592                                    | 17246592                                    |
| Genome End (bp)              | 20702000                                    | 21835946                           | 23651853                                    | 23651853                                    |
| Genome length (Mb)           | 17.87                                       | 21.45                              | 6.41                                        | 6.41                                        |
| Parent A                     | <i>Reiho</i>                                | <i>Gaochan 106</i>                 | <i>Caiapo</i>                               | <i>Caiapo</i>                               |
| Parent B                     | <i>Yamadanishiki</i>                        | <i>Changbai 9</i>                  | <i>O. rufipogon</i><br>(IRGC 105491)        | <i>O. rufipogon</i><br>(IRGC 105491)        |
| References                   | Yoshida et al. (2002)(Yoshida et al., 2002) | Qi et al. (2008)(Qi et al., 2008)  | Moncada et al. (2001)(Moncada et al., 2001) | Moncada et al. (2001)(Moncada et al., 2001) |

## Supporting references

- Abe, Y., Mieda, K., Ando, T., Kono, I., Yano, M., Kitano, H. and Iwasaki, Y. (2010) The SMALL AND ROUND SEED1 (SRS1/DEP2) gene is involved in the regulation of seed size in rice. *Genes Genet. Syst.* **85**, 327-339.
- Chen, Y.S., Lo, S.F., Sun, P.K., Lu, C.A., Ho, T.H. and Yu, S.M. (2015) A late embryogenesis abundant protein HVA1 regulated by an inducible promoter enhances root growth and abiotic stress tolerance in rice without yield penalty. *Plant Biotechnol. J.* **13**, 105-116.
- Deng, Z.Y., Liu, L.T., Li, T., Yan, S., Kuang, B.J., Huang, S.J., Yan, C.J. and Wang, T. (2015) OsKinesin-13A Is an Active Microtubule Depolymerase Involved in Glume Length Regulation via Affecting Cell Elongation. *Scientific reports* **5**, 9457.
- Fan, C., Xing, Y., Mao, H., Lu, T., Han, B., Xu, C., Li, X. and Zhang, Q. (2006) GS3, a major QTL for grain length and weight and minor QTL for grain width and thickness in rice, encodes a putative transmembrane protein. *Theor Appl Genet* **112**, 1164-1171.
- Hiei, Y., Ohta, S., Komari, T. and Kumashiro, T. (1994) Efficient transformation of rice (*Oryza sativa* L.) mediated by *Agrobacterium* and sequence analysis of the boundaries of the T-DNA. *Plant J.* **6**, 271-282.
- Karimi, M., De Meyer, B. and Hilson, P. (2005) Modular cloning in plant cells. *Trends Plant Sci.* **10**, 103-105.
- Li, F., Liu, W., Tang, J., Chen, J., Tong, H., Hu, B., Li, C., Fang, J., Chen, M. and Chu, C. (2010) Rice DENSE AND ERECT PANICLE 2 is essential for determining panicle outgrowth and elongation. *Cell Res.* **20**, 838-849.
- Li, Y., Fan, C., Xing, Y., Jiang, Y., Luo, L., Sun, L., Shao, D., Xu, C., Li, X., Xiao, J., He, Y. and Zhang, Q. (2011) Natural variation in GS5 plays an important role in regulating grain size and yield in rice. *Nat. Genet.* **43**, 1266-1269.
- Liu, L., Tong, H., Xiao, Y., Che, R., Xu, F., Hu, B., Liang, C., Chu, J., Li, J. and Chu, C. (2015) Activation of Big Grain1 significantly improves grain size by regulating auxin transport in rice. *Proc. Natl. Acad. Sci. USA* **112**, 11102-11107.
- Lo, S.F., Ho, T.D., Liu, Y.L., Jiang, M.J., Hsieh, K.T., Chen, K.T., Yu, L.C., Lee, M.H., Chen, C.Y., Huang, T.P., Kojima, M., Sakakibara, H., Chen, L.J. and Yu, S.M. (2017) Ectopic expression of specific GA2 oxidase mutants promotes yield and stress tolerance in rice. *Plant Biotechnol J* **15**, 850-864.
- Lo, S.F., Yang, S.Y., Chen, K.T., Hsing, Y.I., Zeevaart, J.A., Chen, L.J. and Yu, S.M. (2008) A novel class of gibberellin 2-oxidases control semidwarfism, tillering, and root development in rice. *Plant Cell* **20**, 2603-2618.
- Lu, L., Shao, D., Qiu, X., Sun, L., Yan, W., Zhou, X., Yang, L., He, Y., Yu, S. and Xing, Y. (2013) Natural variation and artificial selection in four genes determine grain shape in rice. *New Phytol.* **200**, 1269-1280.

- Moncada, P., Martínez, C.P., Borrero, J., Chatel, M., Gauch Jr, H., Guimaraes, E., Tohme, J. and McCouch, S.R. (2001) Quantitative trait loci for yield and yield components in an *Oryza sativa*×*Oryza rufipogon* BC2F2 population evaluated in an upland environment. *Theor. Appl. Genet.* **102**, 41-52.
- Qi, D., Guo, G., Lee, M.-c., Zhang, J., Cao, G., Zhang, S., Suh, S.-c., Zhou, Q. and Han, L. (2008) Identification of quantitative trait loci for the dead leaf rate and the seedling dead rate under alkaline stress in rice. *J. of Genet. and Genomics* **35**, 299-305.
- Qi, P., Lin, Y.S., Song, X.J., Shen, J.B., Huang, W., Shan, J.X., Zhu, M.Z., Jiang, L., Gao, J.P. and Lin, H.X. (2012) The novel quantitative trait locus GL3.1 controls rice grain size and yield by regulating Cyclin-T1;3. *Cell Res.* **22**, 1666-1680.
- Seo, H.S., Kim, H.Y., Jeong, J.Y., Lee, S.Y., Cho, M.J. and Bahk, J.D. (1995) Molecular cloning and characterization of RGA1 encoding a G protein alpha subunit from rice (*Oryza sativa* L. IR-36). *Plant Mol. Biol.* **27**, 1119-1131.
- Song, X.J., Huang, W., Shi, M., Zhu, M.Z. and Lin, H.X. (2007) A QTL for rice grain width and weight encodes a previously unknown RING-type E3 ubiquitin ligase. *Nat Genet* **39**, 623-630.
- Wang, E., Wang, J., Zhu, X., Hao, W., Wang, L., Li, Q., Zhang, L., He, W., Lu, B., Lin, H., Ma, H., Zhang, G. and He, Z. (2008) Control of rice grain-filling and yield by a gene with a potential signature of domestication. *Nat. Genet.* **40**, 1370-1374.
- Wang, S., Wu, K., Yuan, Q., Liu, X., Liu, Z., Lin, X., Zeng, R., Zhu, H., Dong, G., Qian, Q., Zhang, G. and Fu, X. (2012) Control of grain size, shape and quality by OsSPL16 in rice. *Nat. Genet.* **44**, 950-954.
- Yonemaru, J.-i., Yamamoto, T., Fukuoka, S., Uga, Y., Hori, K. and Yano, M. (2010) Q-TARO: QTL Annotation Rice Online Database. *Rice* **3**, 194-203.
- Yoshida, S., Ikegami, M., Kuze, J., Sawada, K., Hashimoto, Z., Ishii, T., Nakamura, C. and Kamijima, O. (2002) QTL Analysis for Plant and Grain Characters of Sake-brewing Rice Using a Doubled Haploid Population. *Breeding Sci.* **52**, 309-317.

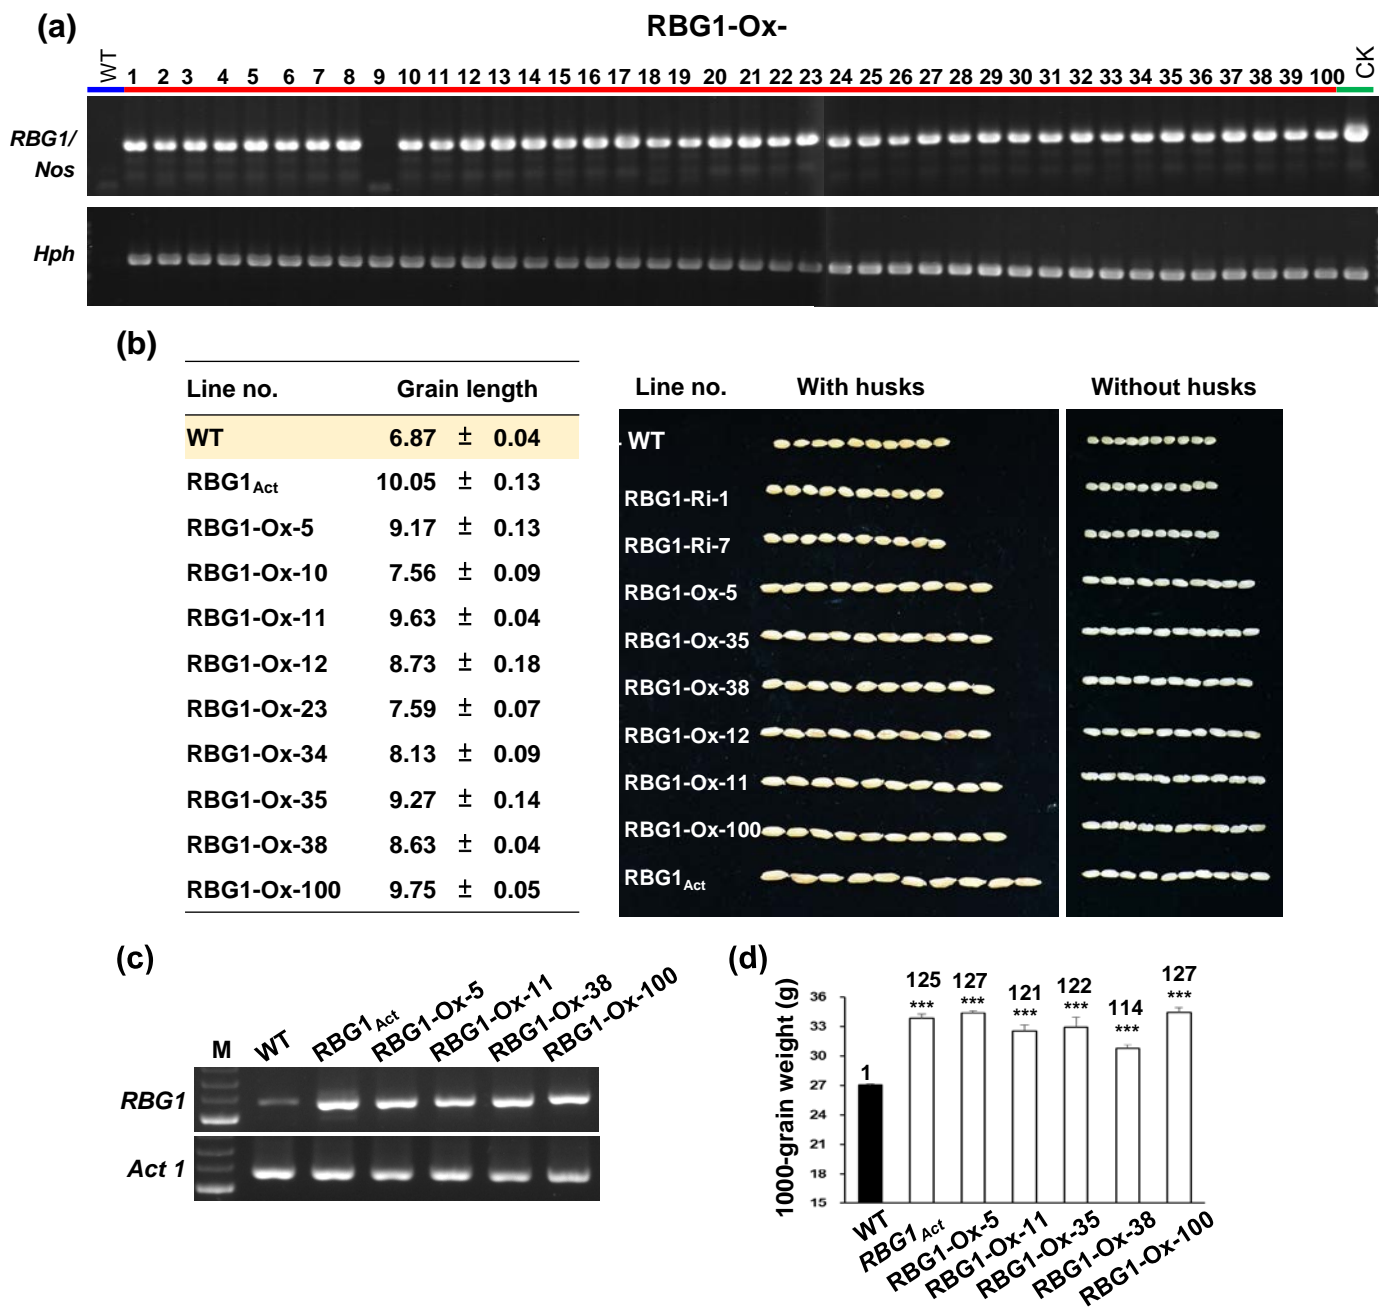

**Figure S1.** Large grain morphology was recapitulated by overexpression of *RBG1* gene.

Transgenic rice overexpressing *RBG1* driven by the *Ubi* promoter. **(a)** Genomic DNA PCR analysis for the intact *RBG1* cDNA (confirmed by *RBG1/Nos* primers) and hygromycin resistance gene (*Hph*) in 39 transgenic rice lines (*RBG1-Ox-*). **(b)** Characterization of 9 independent lines showed overexpression of *RBG1* recapitulated the long grain morphology. **(c)** *RBG1* is highly expressed in transgenic plants relative to WT. **(d)** Overexpression of *RBG1* increases the 1000-grain weight.

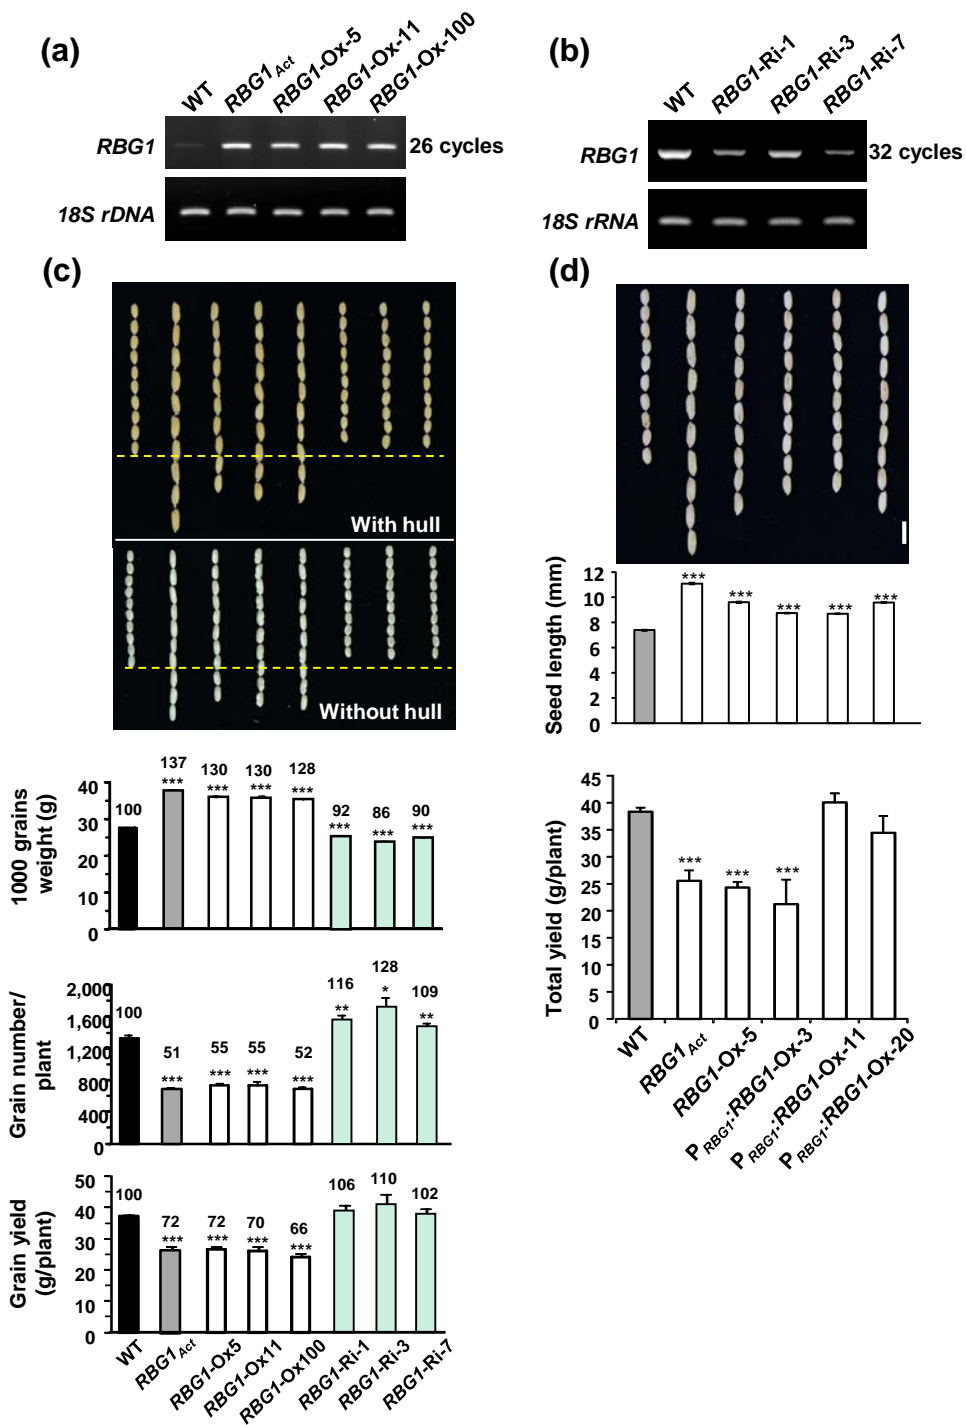

**Figure S2.** Ectopic expression of *RBG1* driven by the *Ubi* promoter enhances grain size but reduces grain number and yield in transgenic rice.

Total RNA was extracted from 3-5 cm long immature rice panicles and subjected to RT-PCR analyses using gene-specific primers (see Table S4). **(a)** Analysis of *RBG1* overexpression transgenic lines. RT-PCR of the *RBG1* gene was conducted with 26 cycles. **(b)** Analysis of *RBG1* RNAi knockdown transgenic lines. RT-PCR of the *RBG1* gene was conducted with 32 cycles. **(c)** *RBG1* expressed under the control of the *Ubi* promoter enhances grain size. The grain size, weight, number and yield in the *RBG1<sub>Acct</sub>*, *RBG1-Ox* and *RBG1-Ri* lines were compared with those of WT. Numbers above bars are % relative to the value in WT. n = 18 for each line. **(d)** *RBG1* expressed under the control of its native promoter also enhances grain size. Lengths of seeds from three transgenic rice lines carrying *RBG1:RBG1* were compared with those from *RBG1<sub>Acct</sub>* or *RBG1-Ox* lines. n = 30. Scale bar = 1 cm.



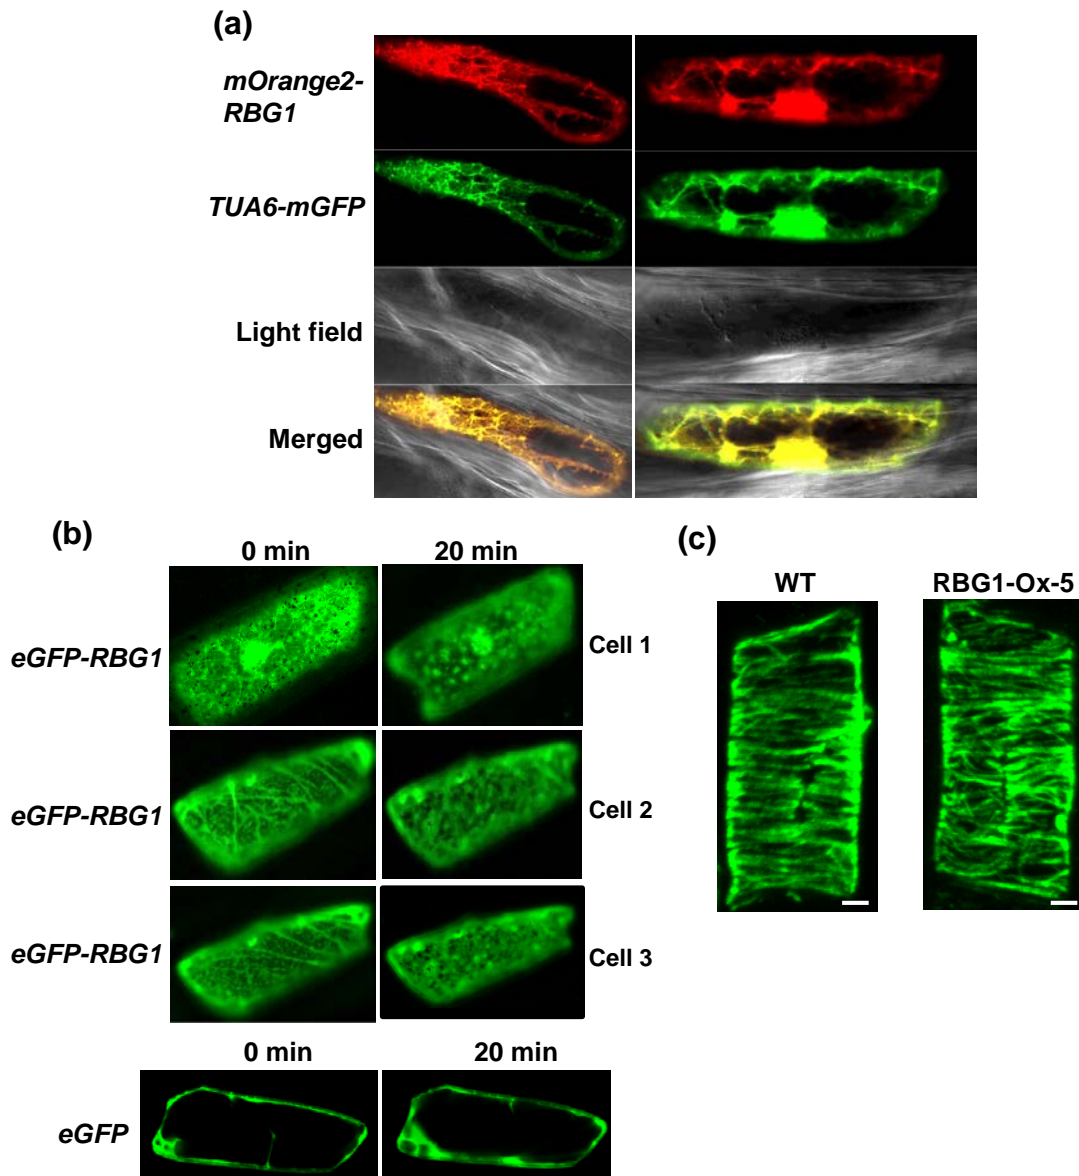

**Figure S3.** RBG1 is co-localized with microtubules.

Cells were transfected with indicated plasmid constructs by particle bombardment and examined under confocal microscopy. **(a)** Onion epidermal cells co-transfected with the constructs *CaMV35S:mOrange-RBG1* and *Ubi:TUA6-eGFP*. **(b)** Onion epidermal cells transfected with the constructs *CaMV35S:eGFP-RBG1* and *CaMV35S:eGFP* were treated with 2  $\mu$ M oryzalin for 20 minutes. The filamentous structure of eGFP-RBG1, but not eGFP alone, was abolished after treatment. The images taken from the surface of three representative cells expressing eGFP-RBG1 are shown here. **(c)** Microtubules in root elongation zone cells of WT and *RBG1-Ox* plants at 4 DAI were subjected to immunofluorescence staining using the anti- $\alpha$ -tubulin mouse primary antibody and AlexaFluor488 goat anti-mouse secondary antibody, and visualized by confocal microscopy. The micrographs of microtubule staining are a maximum projection of the fluorescence signals. Scale bars = 2  $\mu$ m.

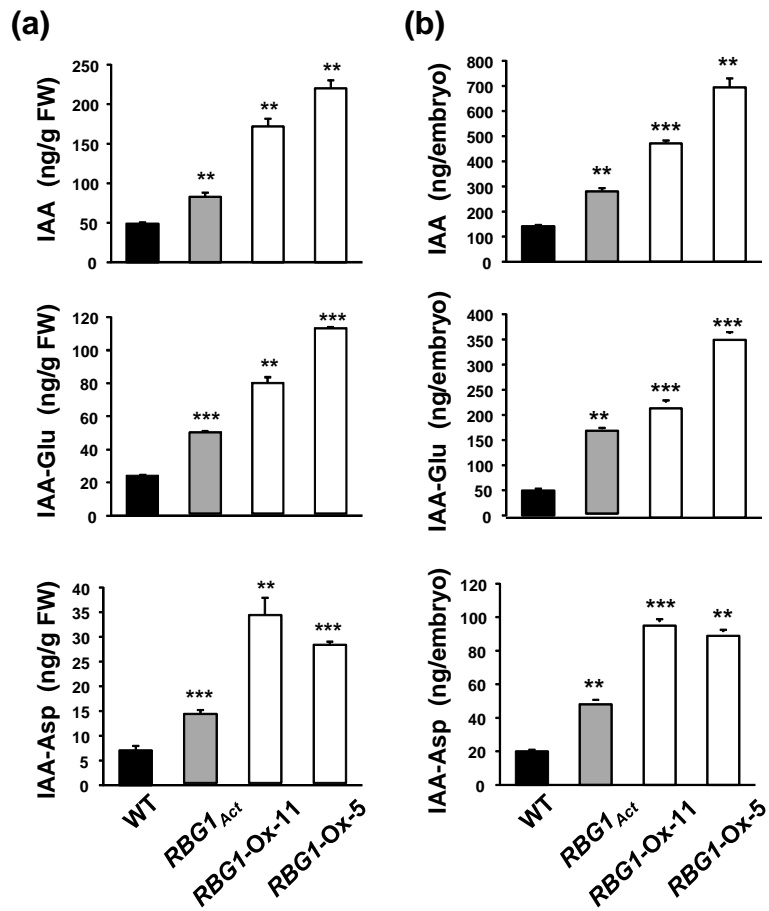

**Figure S4.** *RBG1* enhances the accumulation of endogenous auxin levels.

Coleoptiles and embryos of seedlings at 2 DAI were used for measurement of IAA, IAA-Glu and IAA-Asp levels. Concentrations are based on (a) fresh weight or (b) individual coleoptiles/embryos.

**(a)**

|     | Classification                             | Probe id               | BG1-Ox5 vs WT | MSU locus      | description                                                      |
|-----|--------------------------------------------|------------------------|---------------|----------------|------------------------------------------------------------------|
| IAA | IAA-induced-regulated-responsive-activated | os.15798.1.s1_at       | 4.109         | LOC_Os06g07040 | OsiAA20 - Auxin-responsive Aux/IAA gene family member, expressed |
|     | IAA-induced-regulated-responsive-activated | os.23256.1.s1_at       | 3.904         | LOC_Os02g56120 | OsiAA9 - Auxin-responsive Aux/IAA gene family member, expressed  |
|     | IAA-induced-regulated-responsive-activated | os.9945.1.s1_at        | -3.837        | LOC_Os03g43410 | OsiAA12 - Auxin-responsive Aux/IAA gene family member, expressed |
|     | IAA-induced-regulated-responsive-activated | os.49290.1.s1_at       | -4.319        | LOC_Os06g39590 | OsiAA23 - Auxin-responsive Aux/IAA gene family member, expressed |
|     | IAA-induced-regulated-responsive-activated | os.26512.1.s1_at       | -5.636        | LOC_Os03g58350 | OsiAA14 - Auxin-responsive Aux/IAA gene family member, expressed |
|     | IAA-induced-regulated-responsive-activated | os.39652.1.s1_at       | 10.232        | LOC_Os09g37330 | OsaSAUR39 - Auxin-responsive SAUR gene family member, expressed  |
|     | IAA-induced-regulated-responsive-activated | osaffx.14257.1.s1_x_at | 3.611         | LOC_Os04g43740 | OsaSAUR18 - Auxin-responsive SAUR gene family member, expressed  |
|     | IAA-induced-regulated-responsive-activated | os.8639.1.s1_at        | 3.313         | LOC_Os02g24700 | OsaSAUR8 - Auxin-responsive SAUR gene family member, expressed   |
|     | IAA-induced-regulated-responsive-activated | osaffx.30167.1.s1_at   | -3.693        | LOC_Os09g37380 | OsaSAUR42 - Auxin-responsive SAUR gene family member             |
|     | IAA-induced-regulated-responsive-activated | osaffx.2511.1.s1_at    | -15.825       | LOC_Os02g05060 | OsaSAUR5 - Auxin-responsive SAUR gene family member, expressed   |
|     | IAA-induced-regulated-responsive-activated | os.49607.1.s1_at       | 4.909         | LOC_Os03g09880 | AIR12, putative, expressed                                       |
|     | IAA-induced-regulated-responsive-activated | os.11266.1.s1_at       | 4.208         | LOC_Os04g27060 | auxin-induced protein PCNT115, putative, expressed               |
|     | IAA-induced-regulated-responsive-activated | os.37834.1.s1_a_at     | 3.737         | LOC_Os04g58280 | stem-specific protein TSJT1, putative, expressed                 |
|     | IAA-induced-regulated-responsive-activated | os.11421.1.s1_at       | 3.605         | LOC_Os03g58170 | stem-specific protein TSJT1, putative, expressed                 |
|     | IAA-signal transduction                    | os.23143.1.s1_at       | 3.118         | LOC_Os09g31478 | auxin hydrogen symporter, putative, expressed                    |
|     | IAA-signal transduction                    | os.10149.1.s1_at       | -3.127        | LOC_Os04g32460 | transport inhibitor response 1 protein, putative, expressed      |
|     | IAA-induced-regulated-responsive-activated | os.11585.1.s1_at       | -3.726        | LOC_Os09g27080 | axi 1 like protein, putative, expressed                          |
|     | IAA-induced-regulated-responsive-activated | os.25562.1.s1_at       | -4.044        | LOC_Os05g48270 | dopamine beta-monoxygenase, putative, expressed                  |
|     | IAA-induced-regulated-responsive-activated | osaffx.14314.1.s1_x_at | -6.273        | LOC_Os04g47520 | auxin-independent growth promoter, putative, expressed           |
|     | IAA-signal transduction                    | os.47814.1.a1_s_at     | -7.255        | LOC_Os09g38130 | auxin Efflux Carrier family protein, expressed                   |
|     | IAA-induced-regulated-responsive-activated | os.11469.1.s1_at       | -8.546        | LOC_Os04g26870 | auxin-induced protein PCNT115, putative, expressed               |
|     | IAA-synthesis-degradation                  | os.10435.1.s1_at       | -8.757        | LOC_Os03g62060 | IAA-amino acid hydrolase ILR1 precursor, putative, expressed     |
|     | IAA-induced-regulated-responsive-activated | osaffx.23807.1.s1_x_at | -16.143       | LOC_Os01g56240 | auxin responsive protein, expressed                              |
|     | IAA-induced-regulated-responsive-activated | os.48933.1.s1_at       | -74.971       | LOC_Os05g37880 | axi 1 like protein, putative, expressed                          |

**(b)**

|      | Classification | Probe id             | BG1-Ox5 vs WT | MSU locus      | description                                                                        |
|------|----------------|----------------------|---------------|----------------|------------------------------------------------------------------------------------|
| Heat |                | os.50671.1.s1_x_at   | 34.515        | LOC_Os12g38180 | heat shock cognate 70 kDa protein 2, putative, expressed                           |
|      |                | os.36328.1.s1_at     | 33.340        | LOC_Os01g04340 | 16.9 kDa class I heat shock protein 3, putative, expressed                         |
|      |                | os.55330.1.s1_at     | 28.489        | LOC_Os11g13980 | 22.0 kDa class IV heat shock protein precursor, putative, expressed                |
|      |                | osaffx.12887.2.s1_at | 26.273        | LOC_Os03g16920 | heat shock cognate 70 kDa protein, putative, expressed                             |
|      |                | os.7537.1.s1_at      | 24.579        | LOC_Os04g36750 | 22.0 kDa class IV heat shock protein precursor, putative, expressed                |
|      |                | os.57495.1.a1_x_at   | 18.978        | LOC_Os11g47760 | heat shock cognate 70 kDa protein 2, putative, expressed                           |
|      |                | os.4775.1.s1_at      | 8.772         | LOC_Os01g04380 | 16.9 kDa class I heat shock protein 2, putative, expressed                         |
|      |                | os.22731.1.s1_at     | 8.409         | LOC_Os03g16020 | 17.4 kDa class I heat shock protein 2, putative, expressed                         |
|      |                | os.8926.1.s1_at      | 7.630         | LOC_Os03g14180 | small heat shock protein, chloroplast precursor, putative, expressed               |
|      |                | os.5817.1.s1_at      | 7.422         | LOC_Os06g09560 | dnaJ protein, putative, expressed                                                  |
|      |                | os.12244.1.s1_at     | 7.082         | LOC_Os03g15960 | 17.4 kDa class I heat shock protein 3, putative, expressed                         |
|      |                | osaffx.10905.3.s1_at | 6.605         | LOC_Os01g04360 | 16.9 kDa class I heat shock protein 3, putative, expressed                         |
|      |                | os.2292.2.s1_at      | 5.450         | LOC_Os03g53340 | heat shock factor protein HSF8, putative, expressed                                |
|      |                | os.37000.2.s1_x_at   | 5.104         | LOC_Os07g29794 | calmodulin binding protein, putative, expressed                                    |
|      |                | os.5581.1.s1_at      | 5.039         | LOC_Os03g56540 | mitochondrial import inner membrane translocase subunit TIM14, putative, expressed |
|      |                | os.37773.1.s1_x_at   | 4.959         | LOC_Os03g16030 | 17.4 kDa class I heat shock protein 3, putative, expressed                         |
|      |                | os.47474.1.s1_x_at   | 4.130         | LOC_Os06g44160 | dnaJ protein, putative, expressed                                                  |
|      |                | os.8971.1.s1_at      | 3.727         | LOC_Os05g44340 | heat shock protein 101, putative, expressed                                        |
|      |                | os.3419.1.s1_a_at    | 3.697         | LOC_Os01g50700 | dehydrin family protein, expressed                                                 |
|      |                | os.11039.3.s1_at     | 3.646         | LOC_Os04g01740 | heat shock protein 82, putative, expressed                                         |
|      |                | os.18397.1.s1_at     | 3.617         | LOC_Os02g46640 | chaperone protein dnaJ, putative, expressed                                        |
|      |                | os.50643.2.s1_x_at   | 3.516         | LOC_Os07g44690 | AT-HSFB4, putative, expressed                                                      |
|      |                | os.10884.1.s1_at     | 3.437         | LOC_Os03g58790 | ATPase 3, putative, expressed                                                      |
|      |                | osaffx.17944.1.s1_at | 3.381         | LOC_Os09g28200 | AT-HSFB4, putative, expressed                                                      |
|      |                | os.51749.1.s1_at     | 3.356         | LOC_Os02g54140 | 17.5 kDa class II heat shock protein, putative, expressed                          |
|      |                | os.12257.1.s1_at     | 3.348         | LOC_Os02g52150 | heat shock 22 kDa protein, mitochondrial precursor, putative, expressed            |
|      |                | os.27716.2.s1_a_at   | 3.180         | LOC_Os08g43334 | heat shock factor protein 7, putative, expressed                                   |
|      |                | os.55371.1.s1_at     | 3.070         | LOC_Os02g48140 | 17.4 kDa class I heat shock protein 3, putative, expressed                         |
|      |                | os.50191.1.s1_at     | -3.038        | LOC_Os05g51360 | luminal-binding protein precursor, putative, expressed                             |
|      |                | os.30962.1.s1_at     | -3.078        | LOC_Os02g35000 | chaperone protein dnaJ 10, putative, expressed                                     |
|      |                | osaffx.31338.3.s1_at | -3.157        | LOC_Os11g36960 | dnaJ domain containing protein, expressed                                          |
|      |                | os.11822.1.s1_at     | -3.931        | LOC_Os03g60620 | heat shock cognate 70 kDa protein 2, putative, expressed                           |
|      |                | os.22676.1.s1_at     | -4.356        | LOC_Os02g53750 | protein kinase APK1A, chloroplast precursor, putative, expressed                   |

**Figure S5.** Heat maps indicate that the expression of auxin- and HSP-related genes are significantly up-regulated or down-regulated by *RBG1*.

Total RNAs were purified from coleoptiles and embryos of seedlings at 2 DAI and then subjected to microarray analysis.

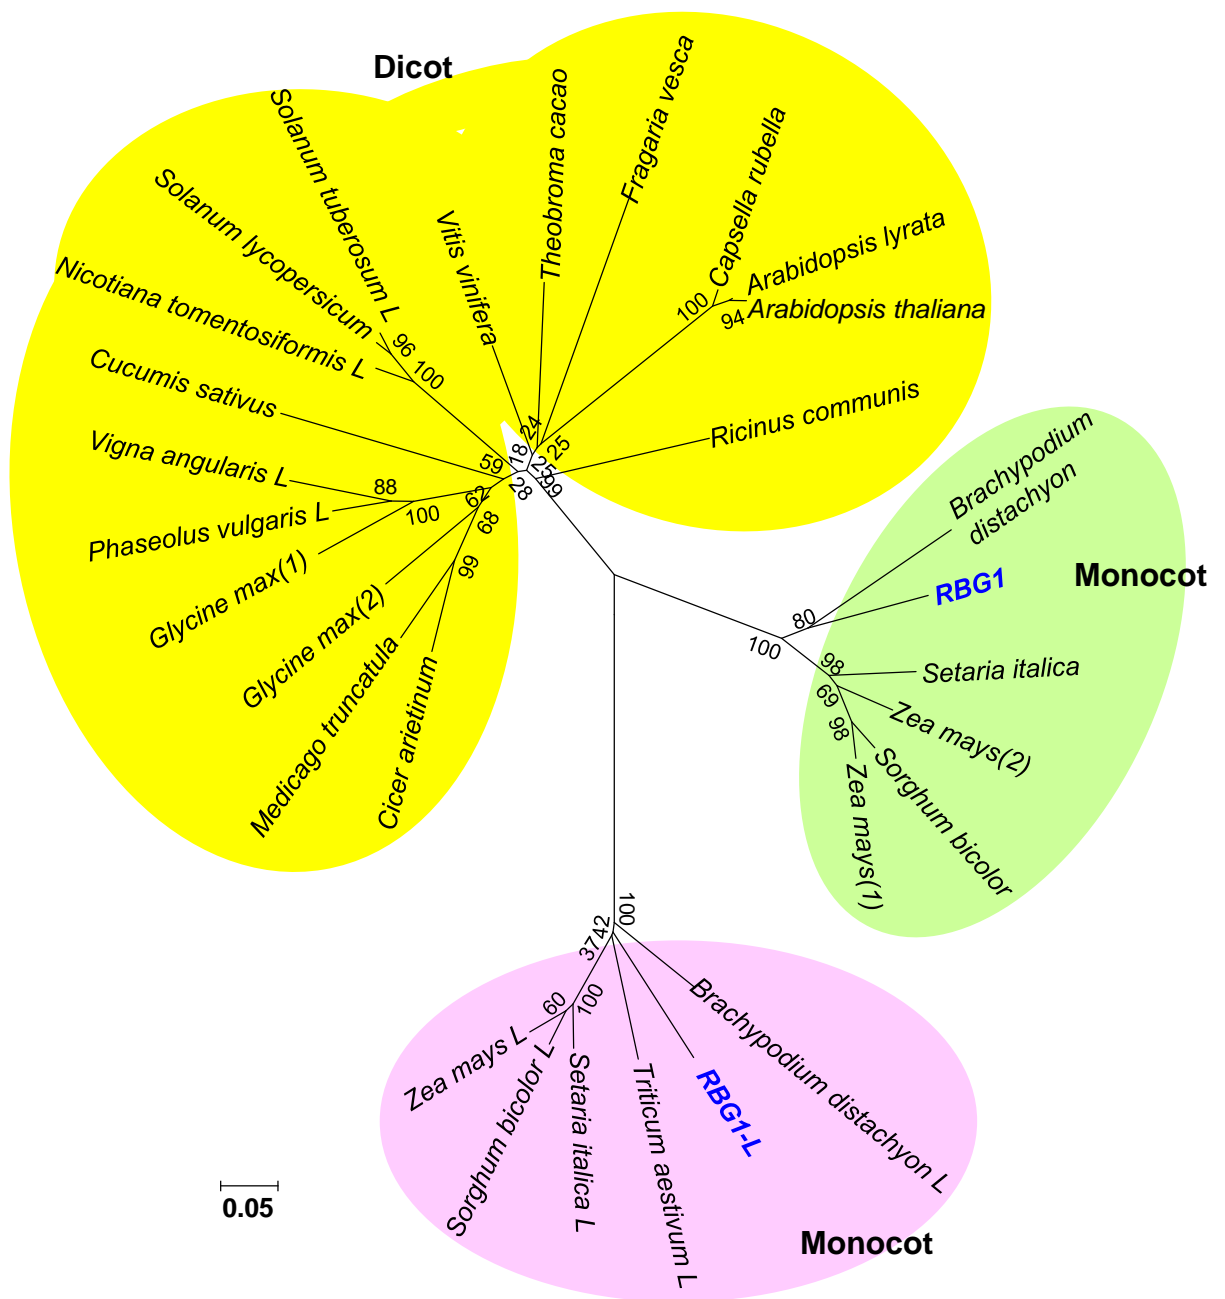

**Figure S6.** Phylogenetic analysis of RBG1 homologous proteins in plants.

RBG1 homologs were identified by the BLASTP program from National Center for Biotechnology Information website (NCBI, <http://blast.ncbi.nlm.nih.gov/Blast.cgi>). Multiple alignment of RBG1 and homologous proteins from different species was carried out by the ClustalW program of the MEGA5.2 software, and a phylogenetic tree was inferred using the neighbor-joining method. The scale value of 0.1 indicates 0.1 amino acid substitutions per site. The accession numbers of RBG1 and RBG1-like homologous proteins are listed in Table S1. No RBG1 homologs have been found in algae, bryophytes, ferns or gymnosperms.





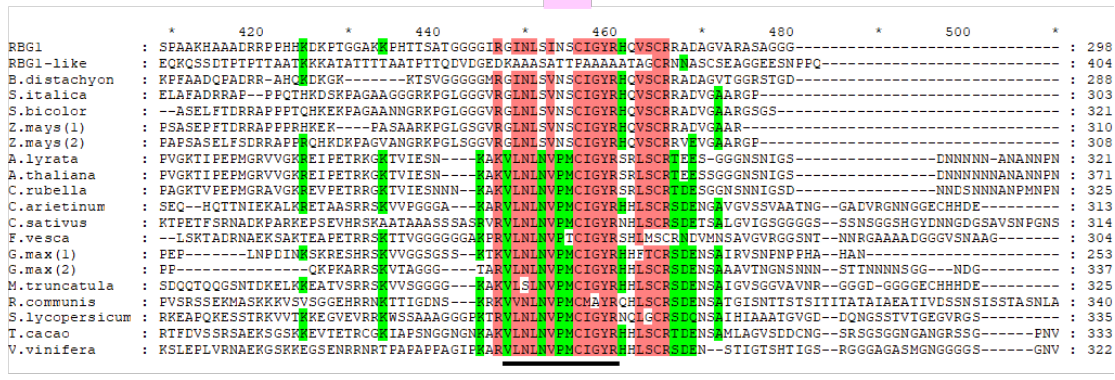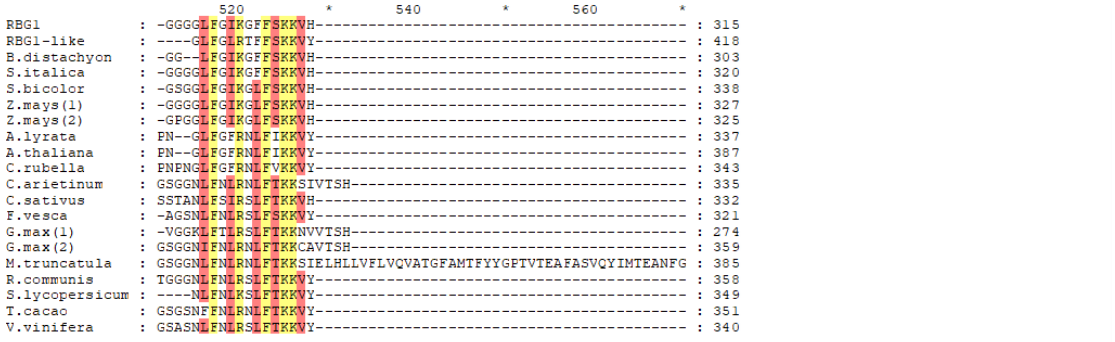

**Figure S7.** Six conserved sequences are present in RBG1 and its homologous proteins from different plant species.

The multiple alignment of RBG1 and homologous proteins was carried out using the ClustalW program of the MEGA 5.2 software. Numbers in pink-shaded areas above amino acid sequences denote the six conserved sequences. The accession numbers of the RBG1 homologous proteins are listed in Table S1. Underlined sections indicate the range of amino acids that were deleted from RBG1 to generate RBG1 conserved sequence-deleted mutants used for rice transformations represented in Figure S8.

(a)

MAAAAQRRRSSASPEFRFWPLDADPAASPCADELFSGGVLLPLQPLPYRRDADLSMSLAVADDDDDDEDEEE  
EEVQPGAAVASRAPPTAAVAASGGGGGSKRWTDIFAKKQQQPAAEEKEKDQPTRRRRPAGGGGGSELNINIWP  
FSRSRSAGGGGVGSSKPRPPPRKASSAPCSRSNSRGEAAAVASSLPPPPRRWAASPGRAGGGVPVGRSSPVWQ  
IRRPPSPAAKHAAADRRPPHHKDKPTGGAKKPHTTSATGGGGIRGINLSINSCIGYRHQVSCRRADAGVARASAGG  
GGGGGLFGIKGFFSKKVH

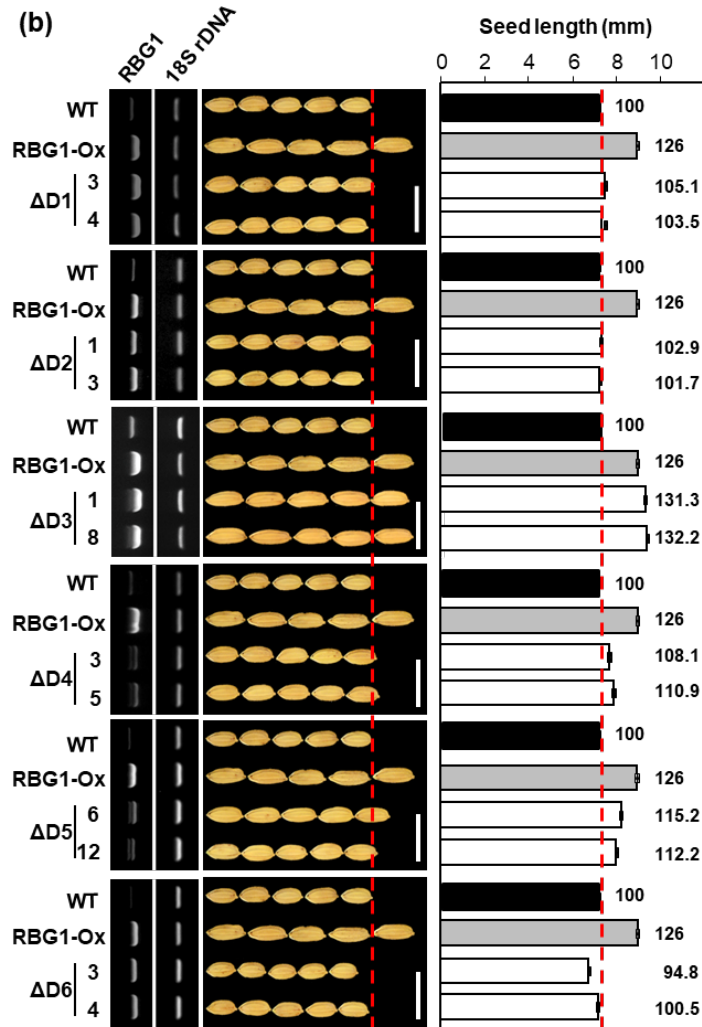

**Figure S8.** Conserved sequences 3 of RBG1 is not essential for its function.

(a) RBG1 amino acid sequence. The inter-conserved sequence regions of RBG1 contain several stretches of amino acid homopolymers (red letters). Underlined regions indicate the six conserved sequences in RBG1 and its homologs. (b) RBG1 truncated at various conserved sequences ( $\Delta$ ) were expressed under the control of the Ubi promoter in transgenic rice. Total RNAs were purified from 3-5 cm long panicles and subjected to RT-PCR analysis for detection of transgene expression levels. Morphology and seed length measurements ( $n = 30$ ) of two representative transgenic lines expressing each motif-deleted RBG1 are shown here. The numbers above bars are % relative to the value (100) in WT. Scale bar = 3 cm.

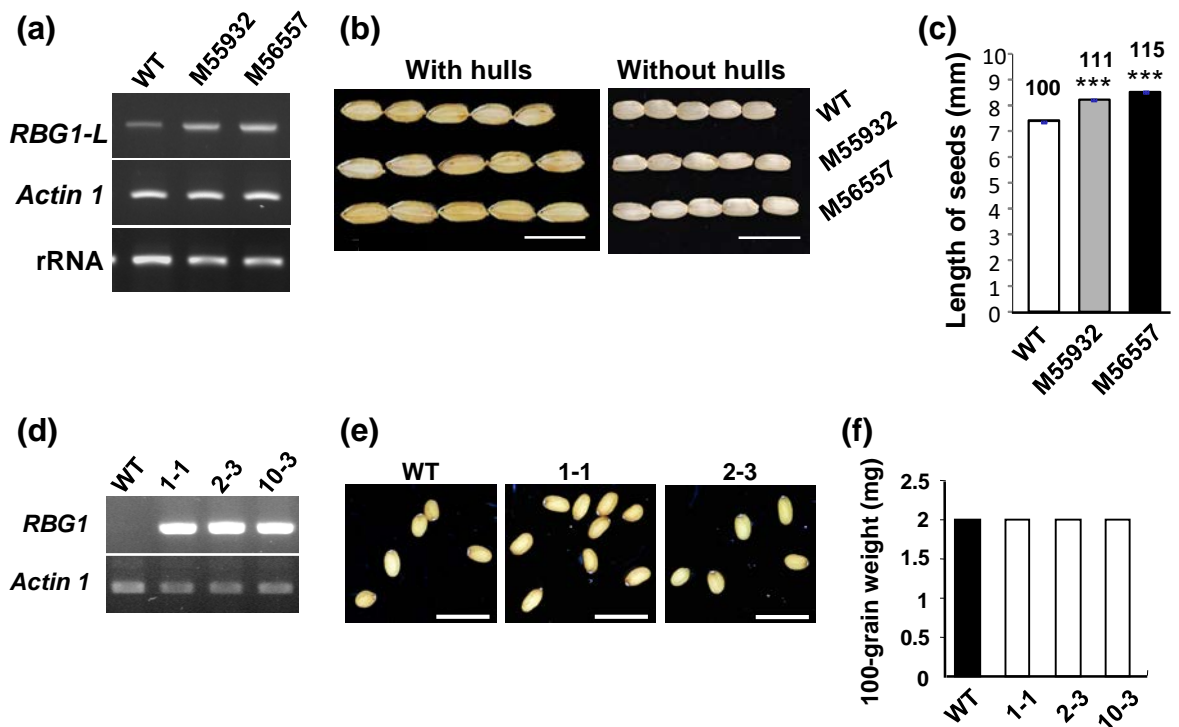

**Figure S9.** Overexpression of *RBG1-L* induces the big grain phenotype, but overexpression of *RBG1* in Arabidopsis does not induce a bigger grain phenotype.

**(a)** *RBG1-L* mRNA levels in two *RBG1-L* activation-tagged mutants, M55932 and M56557. Total RNAs were extracted from 11-15 cm long immature panicles and subjected to RT-PCR analyses using gene-specific primers (Table S4). **(b)** The two *RBG1-L* activation mutants display the big grain phenotype: mature seeds with hulls (left panel) and without hulls (right panel). Scale bar = 1 cm. **(c)** Statistical analysis of seed length (including seed coats) of M55932 and M56557. The numbers above bars are % relative to the value in WT, n = 90. **(d)** *RBG1* mRNA levels in T2 transgenic Arabidopsis overexpressing *RBG1*. **(e)** Seed size is not increased in two transgenic Arabidopsis lines overexpressing *RBG1*. **(f)** The 100-grain weight is not increased in three transgenic Arabidopsis lines overexpressing *RBG1*.



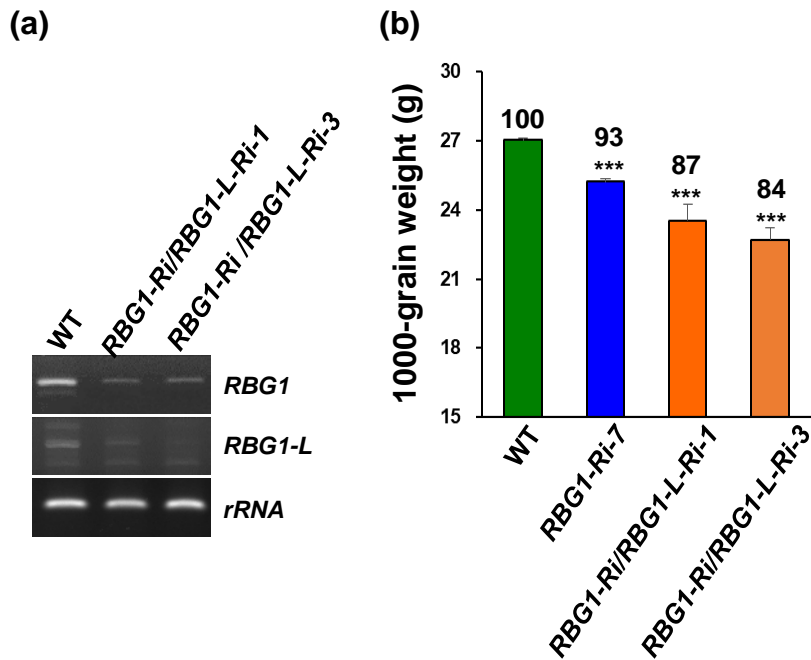

**Figure S10.** Correlations between level of *RBG1* and *RBG1-L* expression and the grain size. (a) Analysis of *RBG1* and *RBG1-L* mRNA levels in the *RBG1* and *RBG1-L* *Ri* double knockdown transgenic lines.

(a) Knockdown expression of both *RBG1* and *RBG1-L* resulted in lower grain weight than the WT and *RBG1-Ri* single knockdown. Numbers above bars are % relative to the value in WT. n = 20, 10, 10, 8 for WT, *RBG1-Ri-7*, *RBG1-Ri/RBG1-L-Ri-1* and *RBG1-Ri/RBG1-L-Ri-3* lines, respectively.

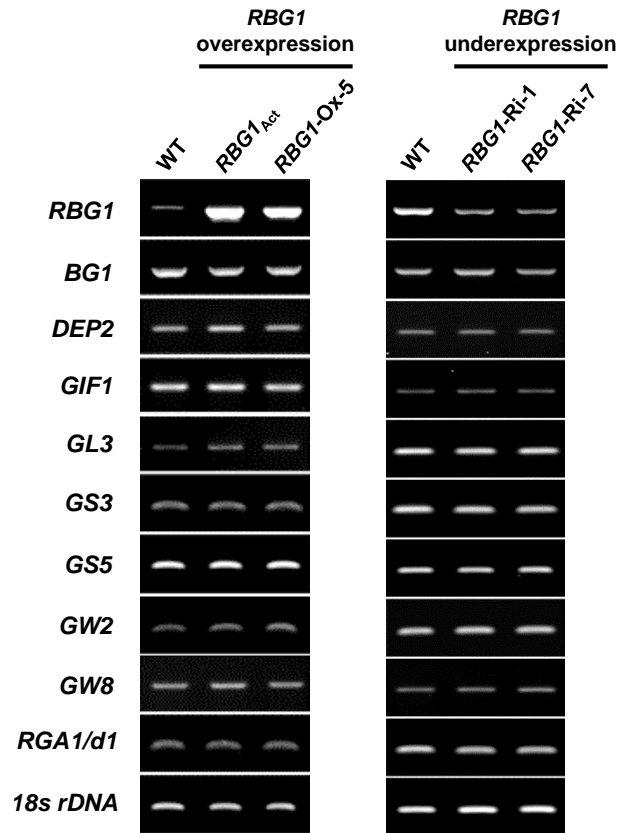

**Figure S11.** *RBG1* overexpression or underexpression does not affect the expression of genes known to regulate grain size in rice.

Total RNAs were extracted from 3-5 cm long immature panicles and subjected to RT-PCR analyses using the gene-specific primers listed in Table S4. References for these genes are also provided in Table S4.

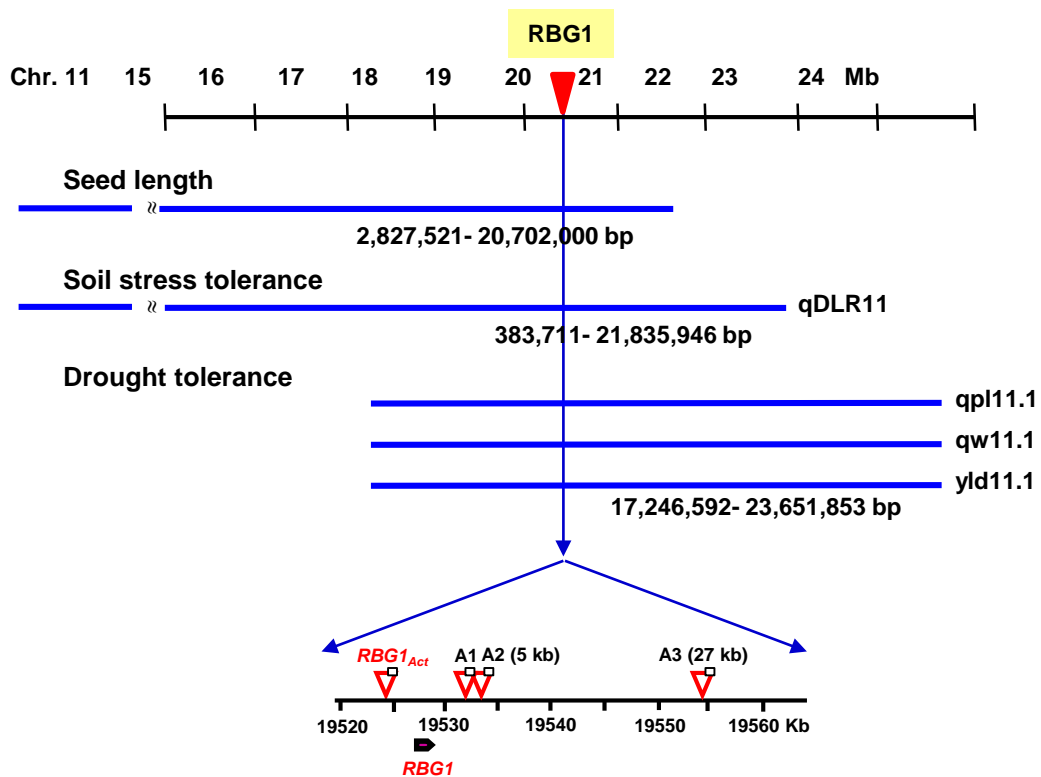

**Figure S12.** RBG1 is located within QTLs controlling seed length, soil stress tolerance and drought stress tolerance in rice.

Relative genome browser locations of QTLs and *RBG1*. The scale in Mb marks the location on rice chromosome 11 in the Q-TARO database. The positions of *RBG1<sub>Act</sub>* and its allelic mutants A1, A2, A3 are denoted.
